# Supplementary material for: Forecasting Inflation in Latin American Countries Using a SARIMA-LSTM Combination
Source: Research Square preprint supplement (doi:10.21203/rs.3.rs-607554/v1), 2021-06-14
Supplement: Supplementary file 1 [file 558c12240a0ed6757bdada44.docx]

Highlights

- Combined SARIMA-LSTM model out performs individual model performance
- SARIMA-LSTM model inflation forecasts are more accurate than traditional models for five Latin American countries
- Hybrid SARMA-ANN model performs better than ANN alone for forecasting inflation
- FIS fits short-term forecast better than SARIMA but not for long-term
